# Supplementary material
Source: PubMed Central journal article supplement (PMC9171418)
Supplement: EMBR-23-e53791-s001.pdf [file EMBR-23-e53791-s001.pdf]

## Expanded View Figures

### Figure EV1. Expression of IL-38 in different tissues and the expression of IL-1 family members in cSCC and DMBA/TPA-induced mouse tumors.

- A IL-38 expression in various tissues sourced from control subjects ( $n = 6-860$ ) using the GTEx database.
- B Representative immunohistochemical staining micrographs of IL-38 and rabbit IgG in human normal skin. Scale bars represent 200  $\mu\text{m}$ .
- C Relative expression of IL-1 family members in human normal tissues ( $n = 9$ ) and cSCC ( $n = 18$ ) were analyzed using Geo Datasets (GSE98767).
- D Relative expression of IL-1 family members in normal tissues ( $n = 9$ ) and cSCC ( $n = 38$ ) of mice analyzed using Geo Datasets (GSE63967).
- E Representative micrographs of human skin sections stained with anti-IL-18 antibody from normal patients ( $n = 11$ ) and tumors of cSCC patients ( $n = 13$ ). Scale bars represent 100  $\mu\text{m}$ . The graph shows the quantification of mean IL-18 expression per high-powered field in tissues.
- F The dorsal hair of normal C57/BL6 mice was shaved and treated with DMBA/TPA twice a week for 32 weeks to induce skin tumors. Representative micrographs of mouse normal skin ( $n = 6$ ) and tumor ( $n = 6$ ) sections stained with anti-IL-18 antibody. Scale bars represent 100  $\mu\text{m}$ . The graph shows the quantification of mean IL-38 expression in tissues.
- G Representative western blot bands indicating IL-18 in mouse normal skin ( $n = 3$ ) and DMBA/TPA-induced tumors ( $n = 3$ ). The graph shows the quantification of mean IL-18 expression in tissues.  $\beta$ -actin blots of Figs EV1G and EV3F are derived from the same experiment.

Data information: Error bars represent the mean  $\pm$  SD. All data are biological replicates. ns, not significant; \* $P < 0.05$ ; \*\* $P < 0.01$ ; \*\*\* $P < 0.001$ ;  $P$  values were calculated using Student's  $t$ -test.

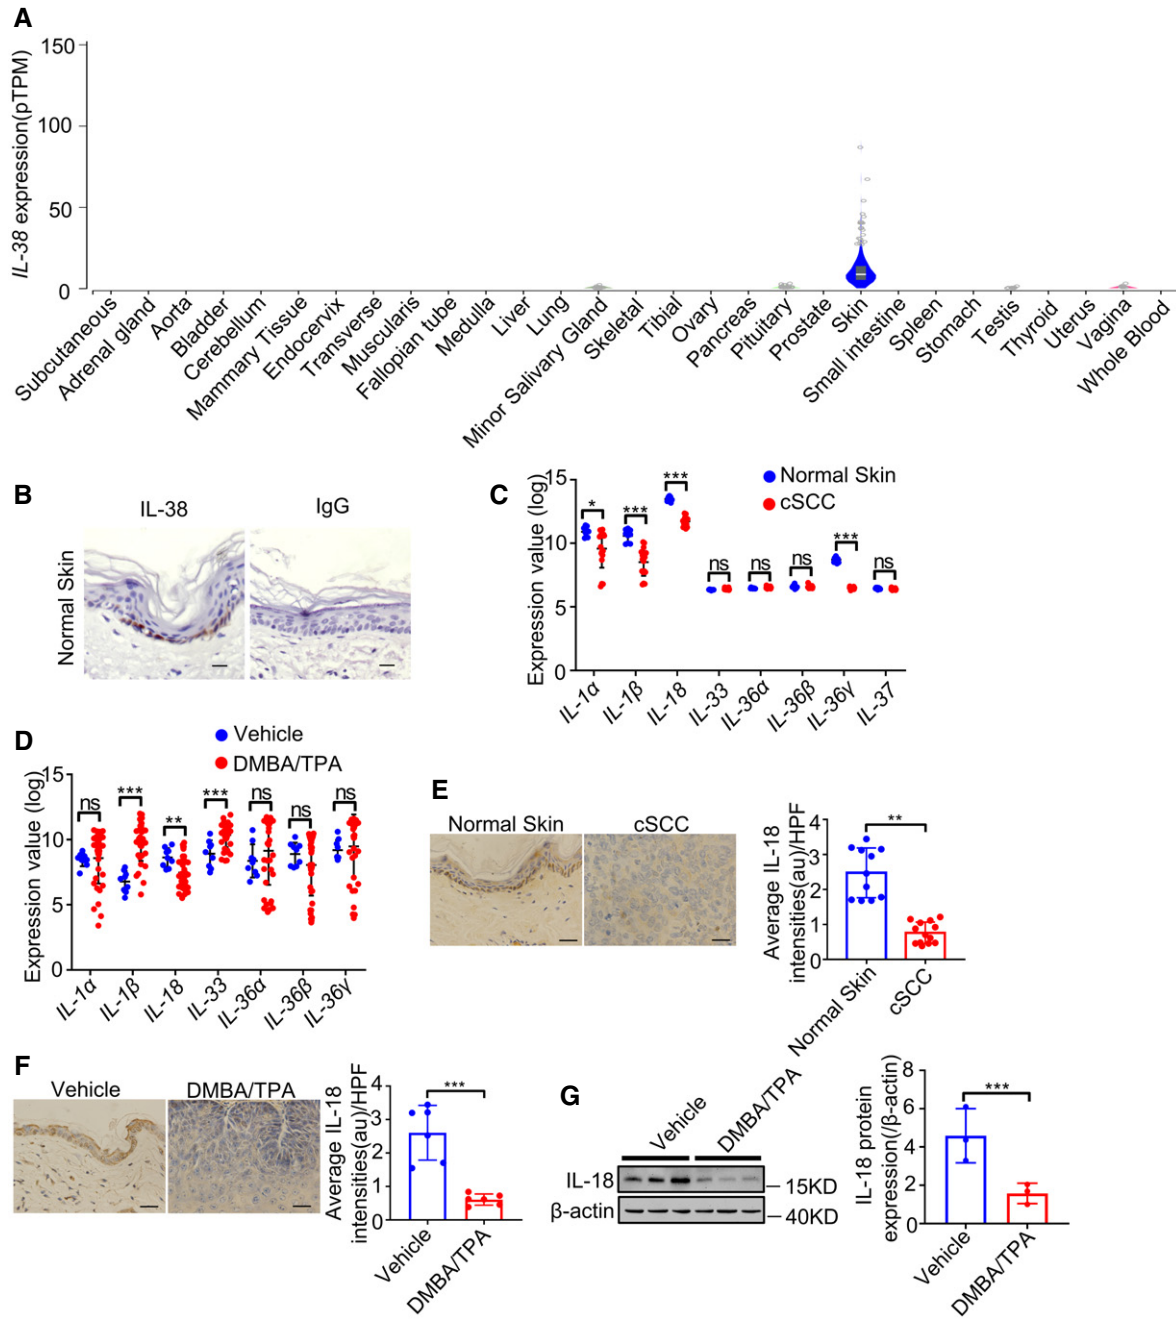

Figure EV1.

**Figure EV2. Construction and identification of keratinocytes IL-38-specific knockout mice and effect of keratinocyte-specific IL-38 deficiency on epidermal barrier.**

- A Construction of *Il-38-loxP* (*Il-38<sup>flf</sup>*) mice.
- B Typical genetic cross scheme of keratinocyte IL-38-specific knockout (*K14<sup>Cre/+</sup>-Il-38<sup>flf</sup>*) mice.
- C PCR analysis of WT mice (at 317 and 245 bp) and *Il-38-loxP* mice (at 387 and 373 bp).
- D PCR analysis of keratin 14 promoter directing expression of Cre recombinase(left) and deletion of IL-38 (right).
- E Relative expression of *IL-38* in the epidermal splits of *Il-38<sup>flf</sup>* ( $n = 4$ ) and *K14<sup>Cre/+</sup>-Il-38<sup>flf</sup>* ( $n = 4$ ) mice.
- F Representative western blot bands indicating IL-38 in the epidermal splits of *Il-38<sup>flf</sup>* and *K14<sup>Cre/+</sup>-Il-38<sup>flf</sup>* mice.
- G Appearance of *Il-38<sup>flf</sup>* and *K14<sup>Cre/+</sup>-Il-38<sup>flf</sup>* mice.
- H Cumulative body weight changes in *Il-38<sup>flf</sup>* ( $n = 12$ ) and *K14<sup>Cre/+</sup>-Il-38<sup>flf</sup>* ( $n = 12$ ) mice in 60 days.
- I Representative histological photographs of skin stained with hematoxylin-eosin (H&E) from *Il-38<sup>flf</sup>* ( $n = 5$ ) and *K14<sup>Cre/+</sup>-Il-38<sup>flf</sup>* ( $n = 5$ ) mice. Scale bars represent 100  $\mu\text{m}$ . The graph shows the quantification of epidermal thickness.
- J Skin barrier-dependent dye exclusion assay using toluidine blue in *Il-38<sup>flf</sup>* mice ( $n = 5$ ) and *K14<sup>Cre/+</sup>-Il-38<sup>flf</sup>* littermate ( $n = 5$ ) at birth.
- K TEWL assay measured on ventral surface of newborn *Il-38<sup>flf</sup>* mice ( $n = 6$ ) and *K14<sup>Cre/+</sup>-Il-38<sup>flf</sup>* littermate ( $n = 6$ ).
- L Representative micrographs of cornified cell envelopes from *Il-38<sup>flf</sup>* ( $n = 4$ ) and *K14<sup>Cre/+</sup>-Il-38<sup>flf</sup>* ( $n = 4$ ) mice. Scale bars represent 100  $\mu\text{m}$ . The graph shows the number of cornified cell envelopes per square millimeter.
- M Representative immunohistochemical staining micrographs of CD45 in the skin of *Il-38<sup>flf</sup>* ( $n = 5$ ) and *K14<sup>Cre/+</sup>-Il-38<sup>flf</sup>* ( $n = 5$ ) mice. Scale bars represent 100  $\mu\text{m}$ . The graph shows average intensities of CD45 per high-powered field.

Data information: Error bars represent the mean  $\pm$  SD. All data are biological replicates. ns, not significant; \* $P < 0.05$ ; \*\* $P < 0.01$ ; \*\*\* $P < 0.001$ ;  $P$  values were calculated using Student's  $t$ -test.

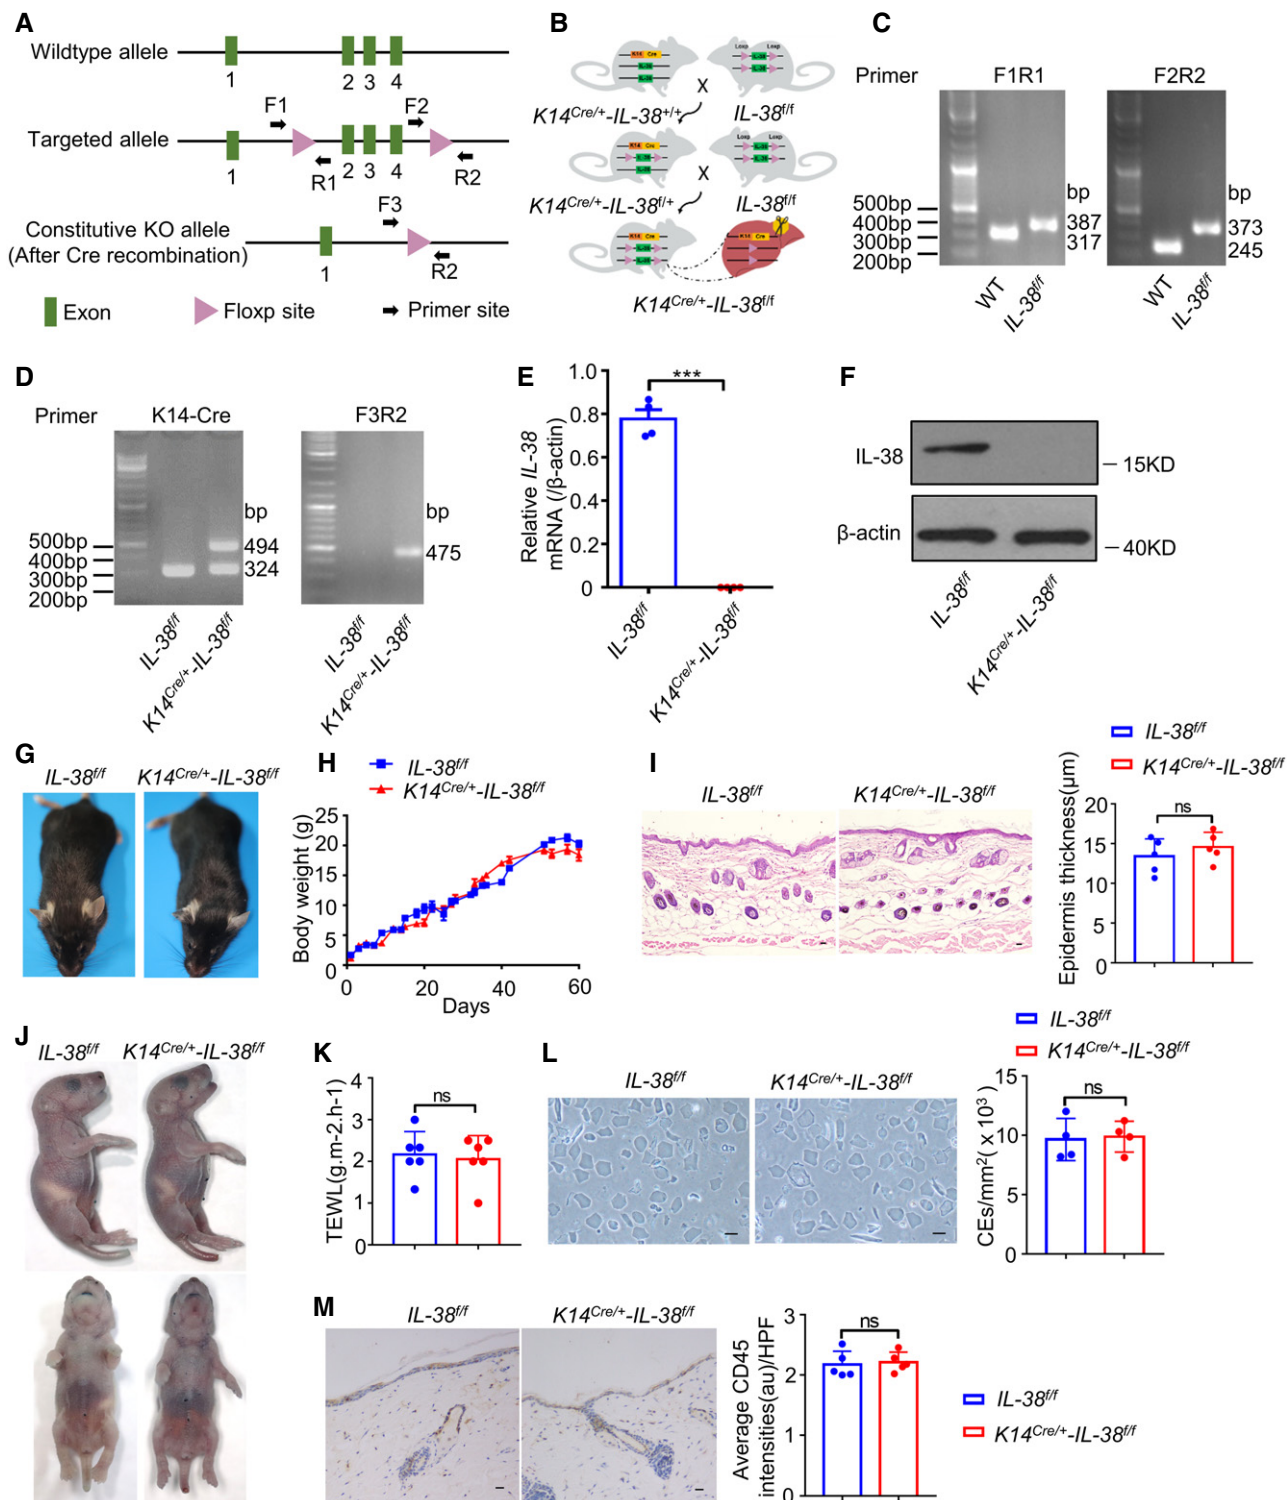

Figure EV2.

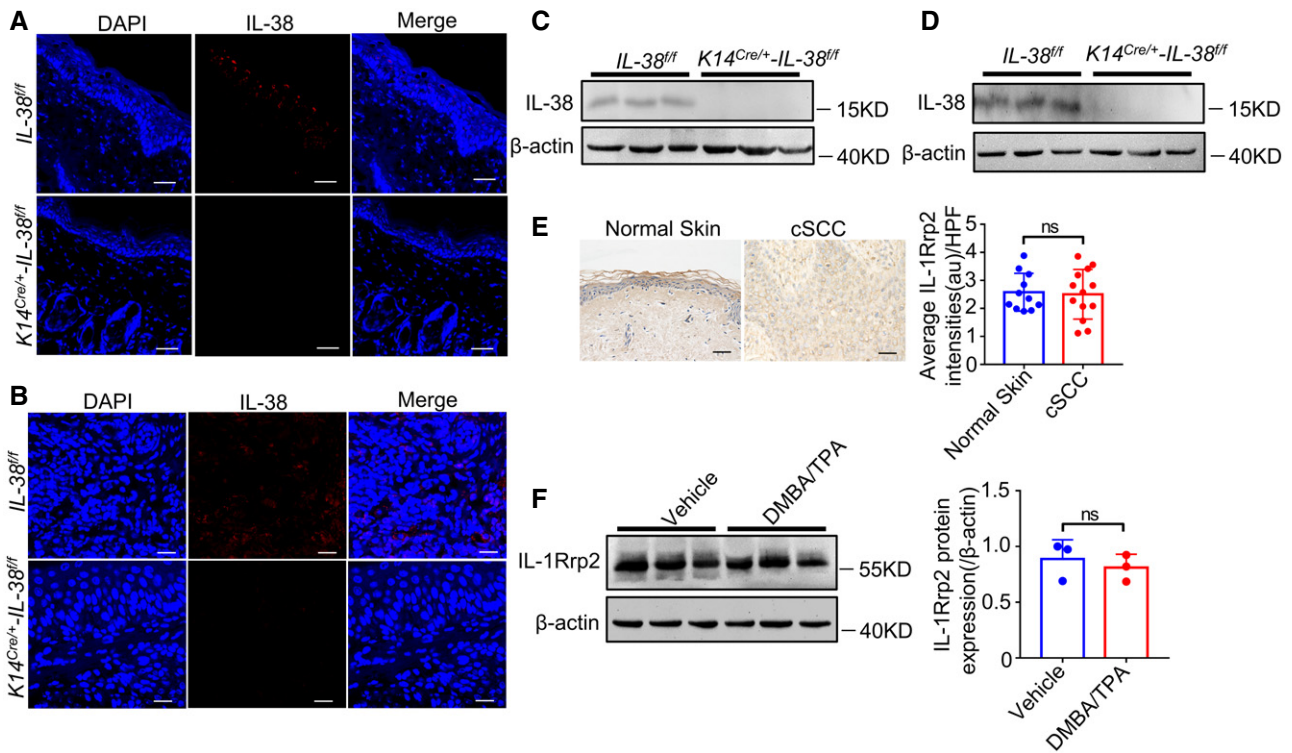

**Figure EV3. Expression of IL-38 and IL-1Rrp2 in tissues.**

A–D The dorsal hair of normal C57/BL6 mice was shaved and treated with DMBA/TPA twice a week for 3 weeks to induce the skin inflammation (A and C). (A) Representative immunofluorescent staining micrographs of IL-38 in the skin of *Il-38<sup>fl/fl</sup>* and *K14<sup>Cre/+</sup>-Il-38<sup>fl/fl</sup>* mice. Scale bars represent 100  $\mu$ m. (C) Relative expression of IL-38 in the skin of *Il-38<sup>fl/fl</sup>* ( $n = 3$ ) and *K14<sup>Cre/+</sup>-Il-38<sup>fl/fl</sup>* ( $n = 3$ ) mice was detected by western blot. The dorsal hair of normal C57/BL6 mice was shaved and treated with DMBA/TPA twice a week for 32 weeks to induce the skin tumors (B and D). (B) Representative immunofluorescent staining micrographs of IL-38 in the tumors of *Il-38<sup>fl/fl</sup>* and *K14<sup>Cre/+</sup>-Il-38<sup>fl/fl</sup>* mice. Scale bars represent 100  $\mu$ m. (D) Relative expression of IL-38 in the tumors of *Il-38<sup>fl/fl</sup>* ( $n = 3$ ) and *K14<sup>Cre/+</sup>-Il-38<sup>fl/fl</sup>* ( $n = 3$ ) mice was detected by western blot.

E Representative immunohistochemical staining micrographs of IL-1Rrp2 from normal patients ( $n = 11$ ) and tumors of cSCC patients ( $n = 13$ ). Scale bars represent 100  $\mu$ m. The graph shows average intensities of IL-1Rrp2 per high-powered field in tissues.

F Relative expression of IL-1Rrp2 in mouse normal skin ( $n = 3$ ) and DMBA/TPA-induced tumors ( $n = 3$ ). The graph shows the quantification of mean IL-1Rrp2 expression in tissues.

Data information: Error bars represent the mean  $\pm$  SD. All data are biological replicates. ns, not significant;  $P$  values were calculated using Student's  $t$ -test.

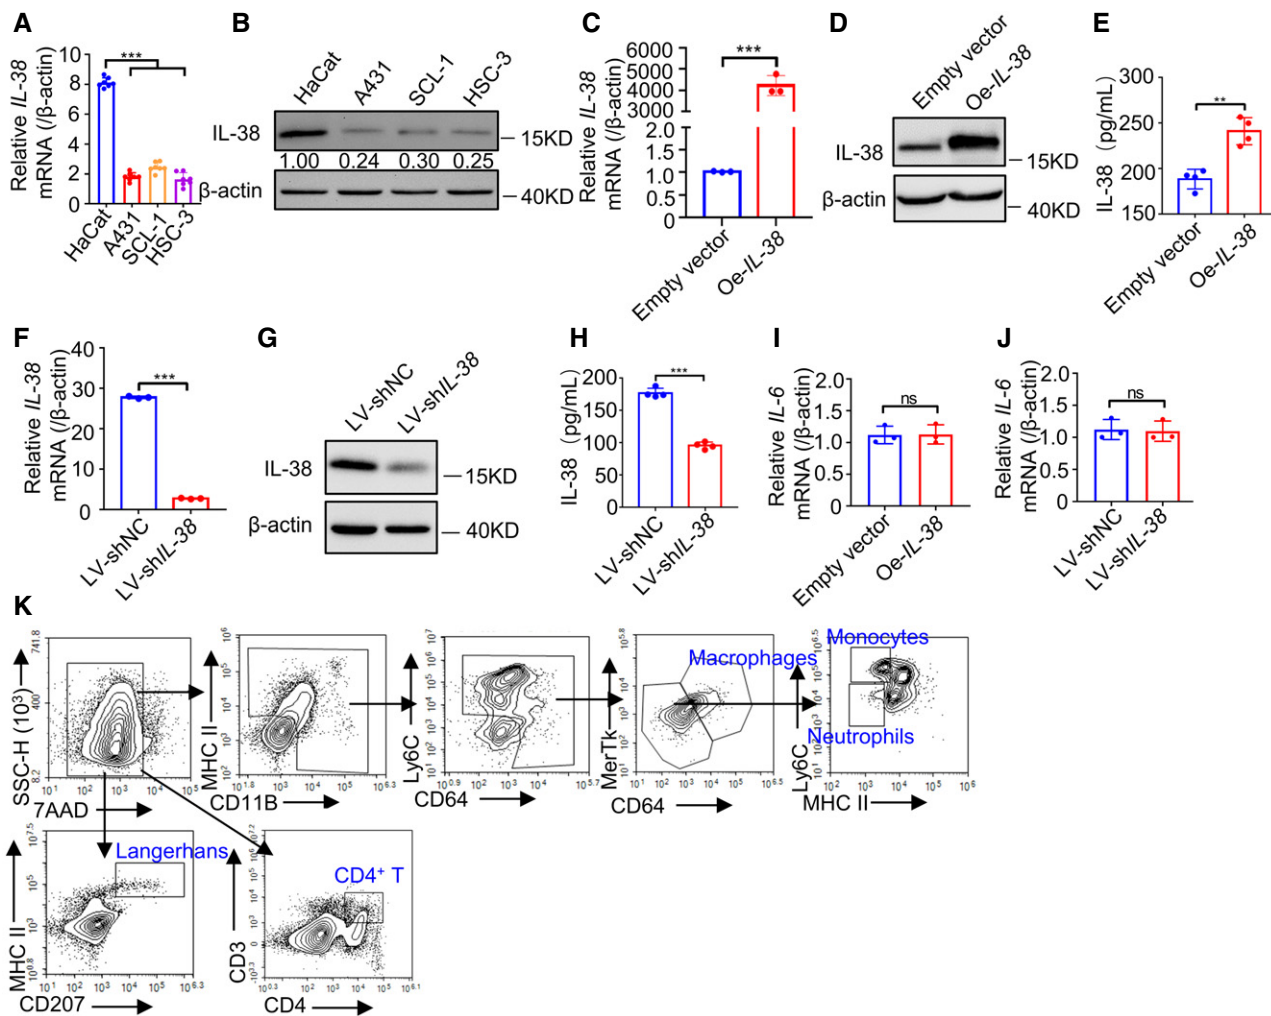

**Figure EV4. Expression of IL-38 and IL-6 in SCC cell lines and the gating strategy for flow cytometry.**

- A Relative expression of *IL-38* in normal skin cells ( $n = 7$ ) and SCC cells ( $n = 7$ ) determined using qPCR.
- B Relative expression levels of IL-38 in normal skin and SCC cells were detected using western blot.
- C–E The *IL-38* overexpression cell line was constructed by transfecting A431 cells with the pcDNA3.1-*IL-38* vector expressing IL-38 and pcDNA3.1 empty vector. (C) Relative expression of *IL-38* was determined using qPCR. (D) Relative expression of IL-38 was detected using western blotting. (E) The secretion of IL-38 was measured using ELISA.
- F–H Lentiviruses containing IL-38 shRNA or Negative Control shRNA were used to infect A431 cells. (F) Relative expression of *IL-38* was determined using qPCR. (G) Relative expression of IL-38 was detected using western blot. (H) IL-38 secretion was measured using ELISA.
- I Relative expression of *IL-6* in *IL-38*-overexpressed A431 cells ( $n = 3$ ) was determined using qPCR.
- J Relative expression of *IL-6* in *IL-38*-knockdown A431 cells ( $n = 3$ ) was determined using qPCR.
- K The flow cytometry gating strategy for immune cell detection in DMBA/TPA-treated skin.

Data information: Error bars represent the mean  $\pm$  SD. All data are biological replicates. ns, not significant; \* $P < 0.05$ ; \*\* $P < 0.01$ ; \*\*\* $P < 0.001$ ;  $P$  values were calculated using one-way ANOVA (A) or Student's  $t$ -test (C, E, F, and H–J).

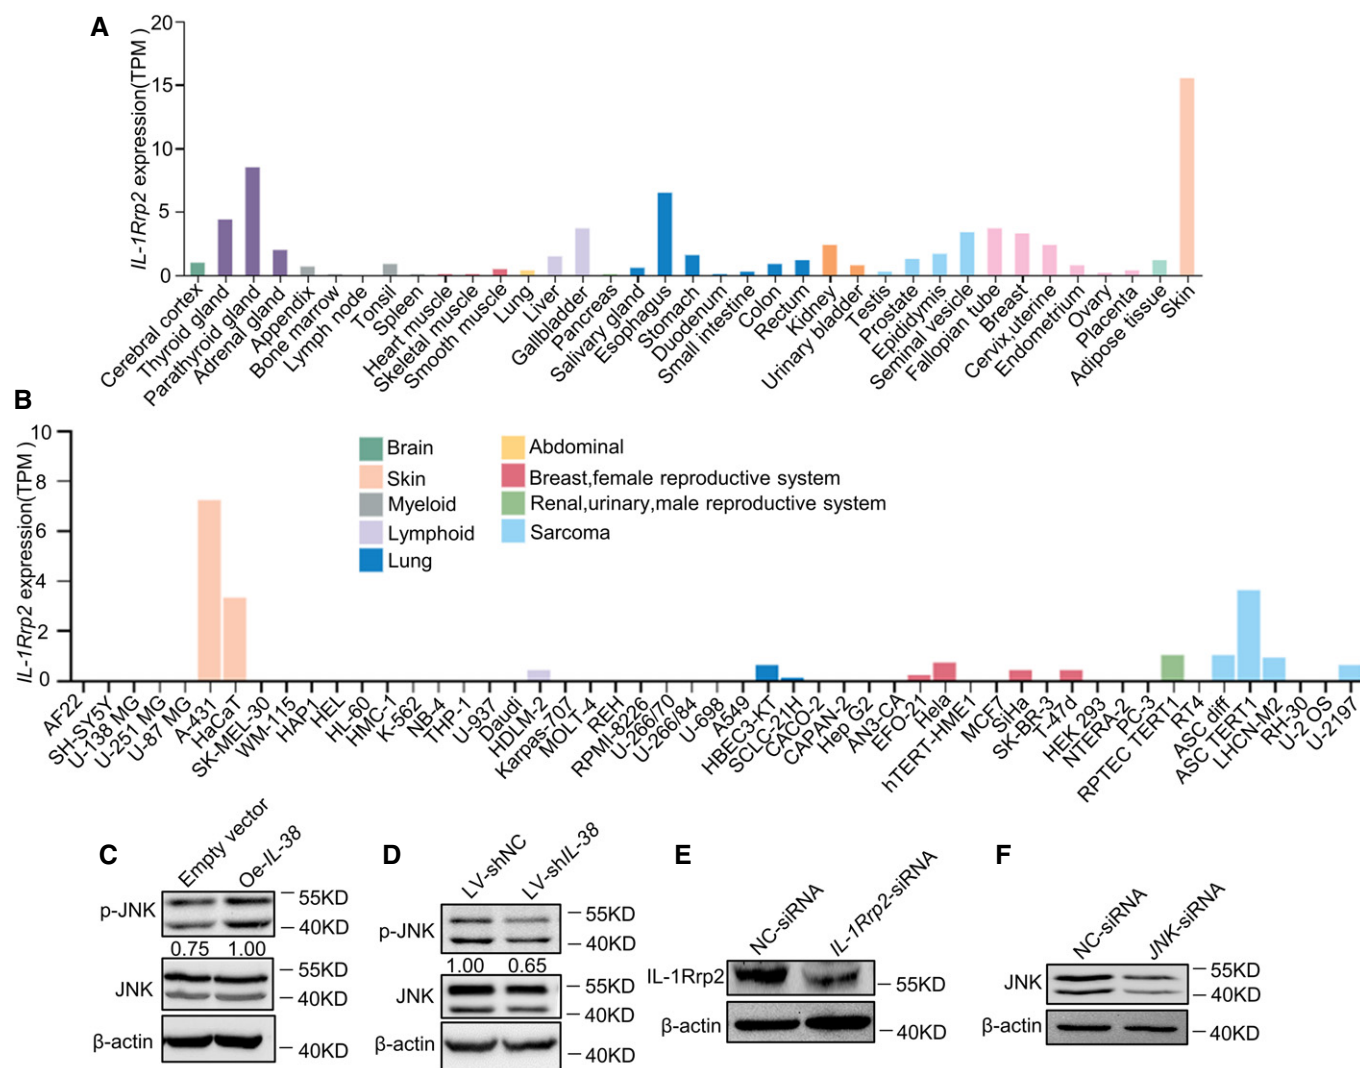

**Figure EV5. Expression of IL-1Rrp2 in tissues and cell lines and the effect of IL-38 on JNK activation in A431 cell line.**

A, B Relative expression of *IL-1Rrp2* in human normal tissues (A) or cell lines (B) based on TPM values. Data were obtained from the Human Protein Atlas Dataset available from [proteinatlas.org](https://www.proteinatlas.org).

C Cell extracts prepared from A431 cells transfected with a mock mammalian expression vector (left) or an expression vector encoding IL-38 (right), were blotted with anti-phospho-JNK, anti-JNK, or anti- $\beta$ -actin antibodies.

D Cell extracts prepared from A431 cells infected with lentiviruses containing Negative Control shRNA (left) or *IL-38* shRNA (right) were probed using anti-phospho-JNK, anti-JNK, or anti- $\beta$ -actin antibodies.

E The expression of IL-1Rrp2 in A431 cells transfected with *IL-1Rrp2*-siRNA was detected using western blot.

F The expression of JNK in A431 cells transfected with *JNK*-siRNA was detected using western blot.
