# Supplementary material
Source: PubMed Central journal article supplement (PMC9171418)
Supplement: EMBR-23-e53791-s002.pdf [file EMBR-23-e53791-s002.pdf]

## Appendix - Table of content

|                                                                      |   |
|----------------------------------------------------------------------|---|
| <b>Appendix Table S1.</b> Primer sequences used for PCR.....         | 1 |
| <b>Appendix Table S2.</b> Human primer sequences used for qPCR ..... | 1 |
| <b>Appendix Table S3.</b> Mouse primer sequences used for qPCR ..... | 1 |

**Appendix Table S1. Primer sequences used for PCR**

| Gene        | Forward (5' to 3')         | Reverse (5' to 3')        |
|-------------|----------------------------|---------------------------|
| F1R1        | TCACAGTTACTACATCTTCAGTTCC  | CACCTTACTGGACAACCACATGGAG |
| F2R2        | CCATGAAGCTCTGGCTAGACACCA   | CACACCATAGCCCAGACATGCC    |
| F3R2        | ACATACTTACCCTCCTAGGCACGTCA | CACACCATAGCCCAGACATGCC    |
| K14-CRE     | TTCCTCAGGAGTGTCTTCGC       | GTCCATGTCCTTCCTGAAGC      |
| K14-CRE IPC | CTAGGCCACAGAATTGAAAGATCT   | GTAGGTGGAATTCATGATCATCC   |

**Appendix Table S2. Human primer sequences used for qPCR**

| Gene           | Forward (5' to 3')     | Reverse (5' to 3')     |
|----------------|------------------------|------------------------|
| $\beta$ -actin | CCACGAAACTACCTTCAACTCC | GTGATCTCCTTCTGCATCCTGT |
| IL-38          | GCTGGTGGGAGATCCTGTTG   | GTAGGGAAGGCCCTCTTCT    |
| IL-1Rrp2       | CTGGACAAGCCGTGGCCAATGT | AGCCCAGCGATTCGGGGACC   |
| IL-1 $\beta$   | TTGTTGAGCCAGGCCTCTCT   | ACCAAATGTGGCCGTGGTT    |
| IL-12          | CTTGTGGCTACCCTGGTCTCT  | GAGTTTGTCTGGCCTTCTGG   |
| IL-22          | GCAGGCTTGACAAGTCCAACT  | GCCTCCTTAGCCAGCATGAA   |
| TNF- $\alpha$  | CTCTTCTGCCTGCTGCACCTTG | ATGGGCTACAGGCTTGTCACTC |
| CXCL1          | GGACTTCACGTTACACTTTG   | AACCGAAGTCATAGCCACAC   |
| CXCL2          | GGGCAGAAAGCTTGTCTCAA   | GCTTCCTCCTTCCTTCTGGT   |
| CCL17          | GGCTTCTCTGCAGCACATC    | GGAATGGCTCCCTTGAAGTA   |
| CCL20          | CGTGTGAAGCCCACAATAAA   | GTGCTGCTACTCCACCTCTG   |
| IL-6           | GGATTCAATGAGGAGACTT    | ATCTGTTCTGGAGGTACT     |

**Appendix Table S3. Mouse primer sequences used for qPCR**

| Gene           | Forward (5' to 3')      | Reverse (5' to 3')      |
|----------------|-------------------------|-------------------------|
| $\beta$ -actin | CCTCTATGCCAACACAGTGC    | ACATCTGCTGGAAGGTGGAC    |
| IL-38          | AGCTTGGGATCTGCCTTCAG    | CAGTATGGGTGGAGGGTTCAC   |
| IL-1Rrp2       | TGGAGGGGAGTCCCATAAAT    | AGGGCTGTACTTTTTCCCCG    |
| IL-1 $\beta$   | ATAACCTGCTGGTGTGTGACGTT | AAGGCCACAGGTATTTTGTGCTT |
| IL-12          | ACTCTGCGCCAGAAACCTC     | CACCCTGTTGATGGTCACGAC   |
| IL-22          | TTTCCTGACCAAACCTCAGCA   | CTGGATGTTCTGGTCGTCAC    |
| TNF- $\alpha$  | GGTGCCTATGTCTCAGCCTCTT  | GCCATAGAAGTATGAGAGGGAG  |
| CXCL1          | TCCAGAGCTTGAAGGTGTTGCC  | AACCAAGGGAGCTTCAGGGTCA  |
| CXCL2          | CATCCAGAGCTTGAGTGTGACG  | GGCTTCAGGGTCAAGGCAAACCT |
| CCL17          | CGAGAGTGCTGCCTGGATTACT  | GGTCTGCACAGATGAGCTTGCC  |
| CCL20          | GTGGGTTTTCAAGACAGATGGC  | CCAGTTCTGCTTTGGATCAGCG  |
